# Supplementary material
Source: publisher figshare collection journal article supplement (https://acs.figshare.com/ndownloader/files/24135580)
Supplement: Supplementary file 1 [file 24135580]

## **Supporting Information**

### **Industrially Promising Nanowire Heterostructure Catalyst for Enhancing Overall Water Splitting at Large-Current-Density**

Guangfu Qian<sup>#</sup>, Jinli Chen<sup>#</sup>, Lin Luo, Tianqi Yu, Yamei Wang, Wenjie Jiang, Qinglian Xu, Shouqsuan Feng,  
Shibin Yin\*

Guangxi Key Laboratory of Petrochemical Resource Processing and Process Intensification  
Technology, College of Chemistry and Chemical Engineering, School of Physical Science and  
Technology, State Key Laboratory of Processing for Non-Ferrous Metal and Featured Materials,  
Guangxi University, 100 Daxue Road, Nanning 530004, P. R. China

Total number of pages (including cover page): 14

Total number of Figures: 23

\*Corresponding author email: yinshibin@gxu.edu.cn (S. Yin).

<sup>#</sup> These two authors contributed equally to this work.

## 1. Supplementary Figures

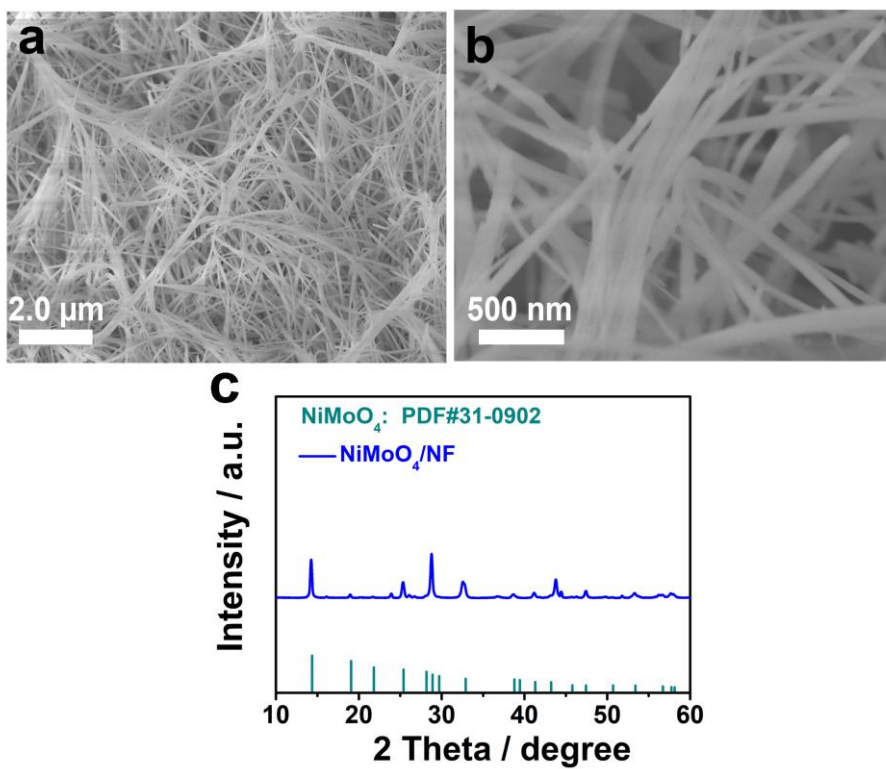

**Figure S1.** (a, b) SEM and (c) XRD images of the precursors.

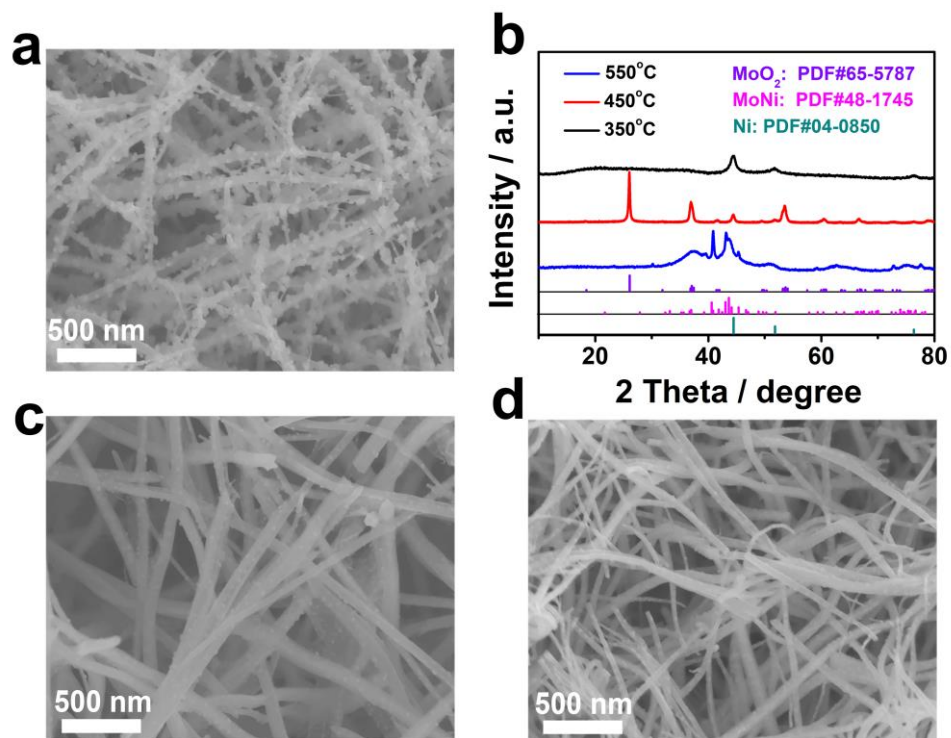

**Figure S2.** (a, c, d) The precursors are annealed at 450, 350, and 550 °C, respectively; (b) the XRD patterns of the (Ni-MoO<sub>2</sub>)@C/NF obtained at different temperatures.

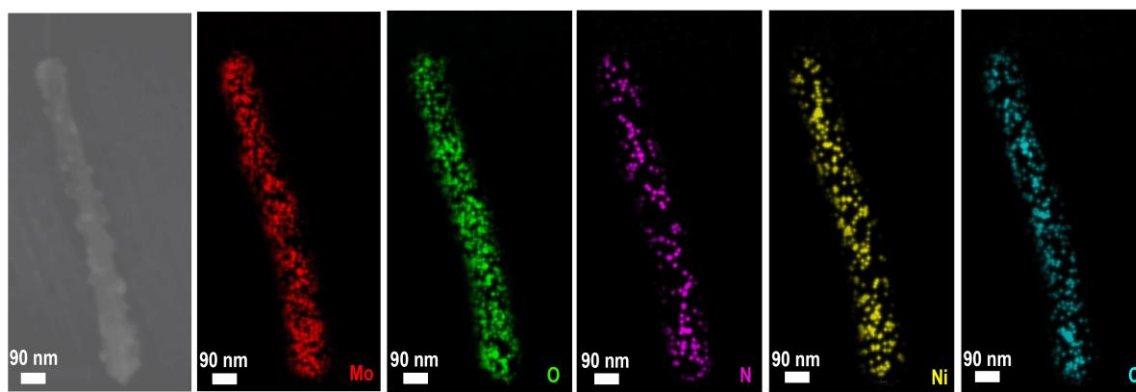

**Figure S3.** The EDS of SEM mappings after annealed at 450 °C.

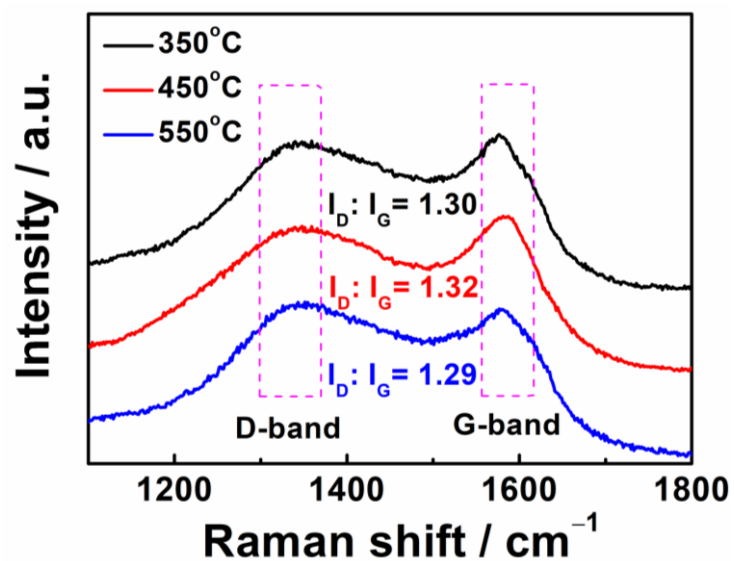

**Figure S4.** Raman curves of (Ni-MoO<sub>2</sub>)@C/NF annealed at different temperatures.

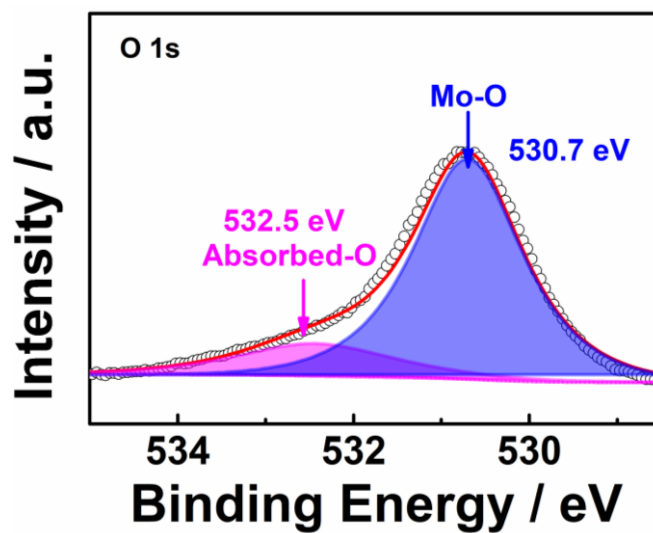

**Figure S5.** XPS image of (Ni-MoO<sub>2</sub>)@C/NF for O 1s.

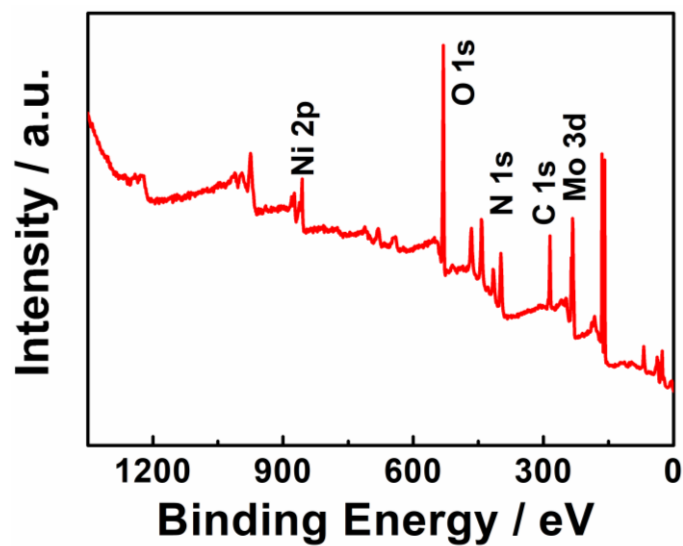

**Figure S6.** XPS summary spectra of (Ni-MoO<sub>2</sub>)@C/NF NWs.

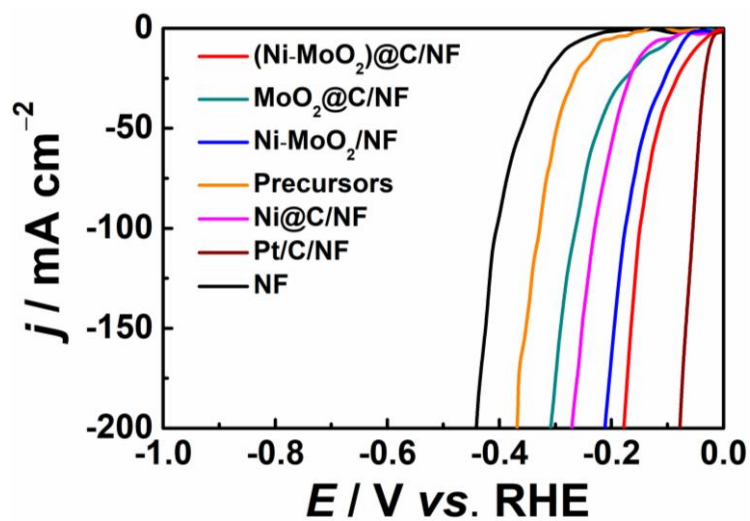

**Figure S7.** LSV curves for HER of the investigated catalysts in 1.0 M KOH.

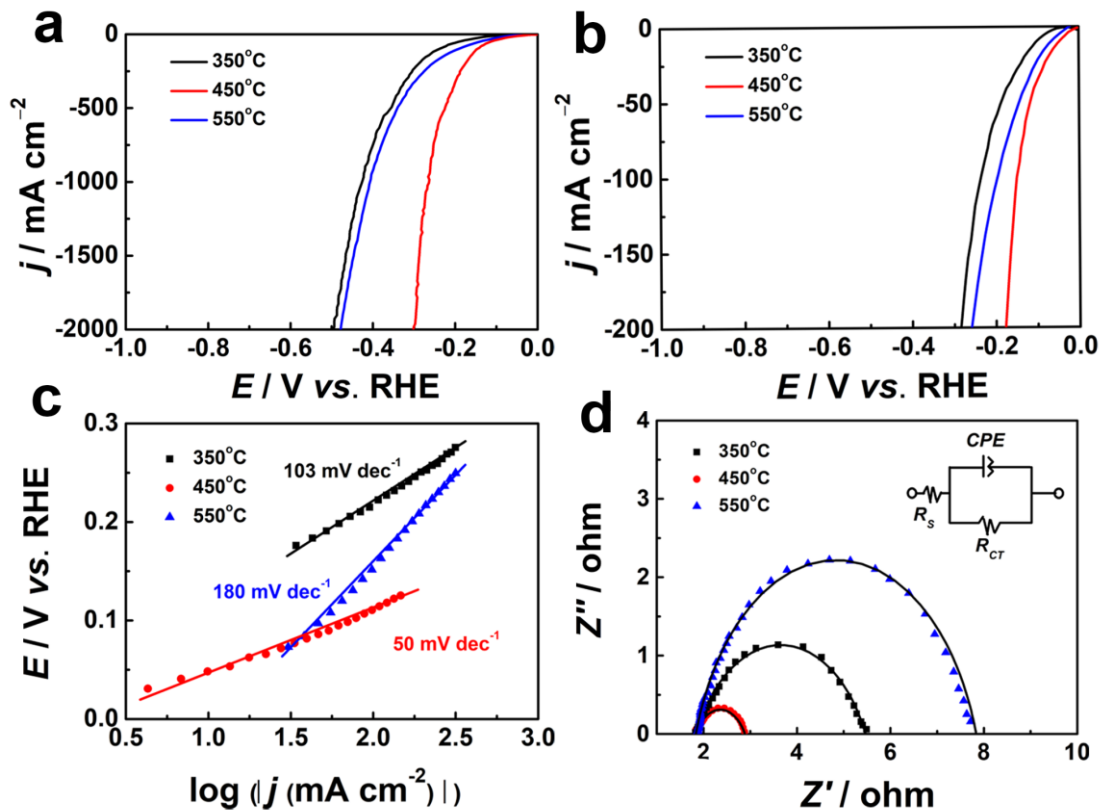

**Figure S8.** (a, b) LSV curves for HER of (Ni-MoO<sub>2</sub>)@C/NF at different temperatures; (c) corresponding Tafel slopes; (d) corresponding Nyquist plots tested at -0.20 V for HER with a frequency from 100 kHz to 100 mHz in 1.0 M KOH; inset is the equivalent circuit model.

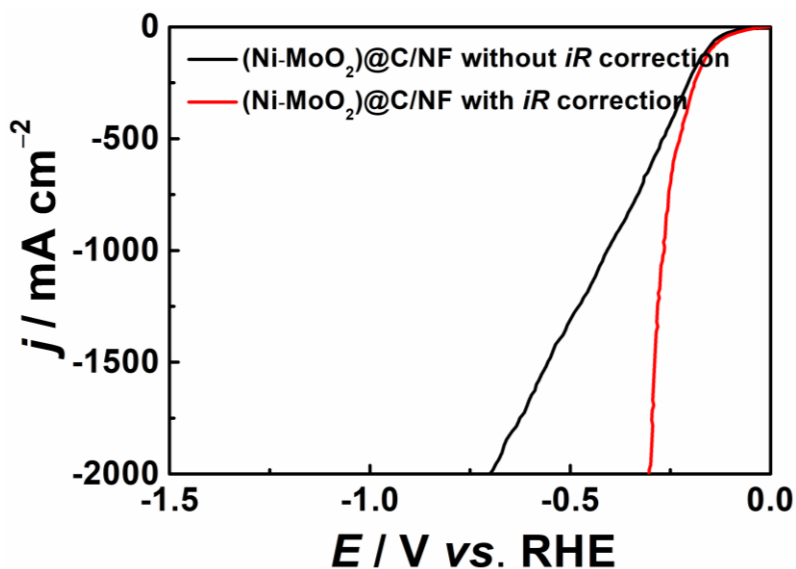

**Figure S9.** LSV curves of (Ni-MoO<sub>2</sub>)@C/NF with/without  $iR$  correction for HER.

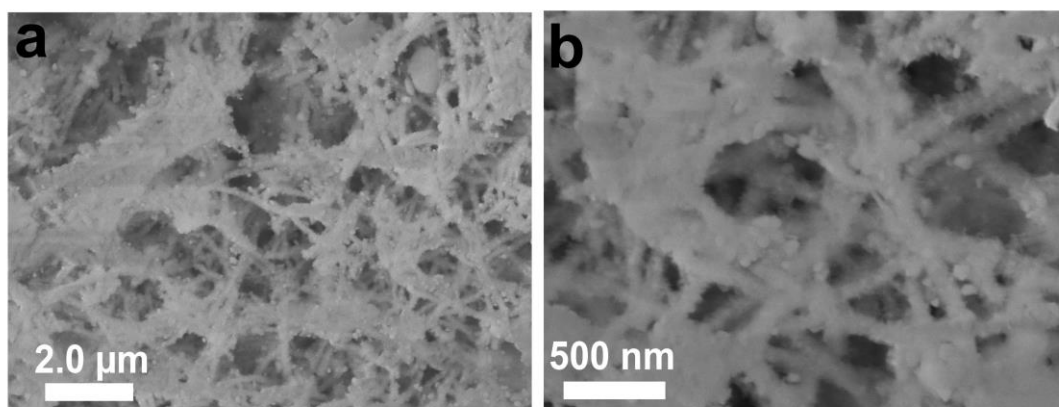

**Figure S10.** (a, b) SEM images of (Ni-MoO<sub>2</sub>)@C/NF after hydrogen evolution stability test.

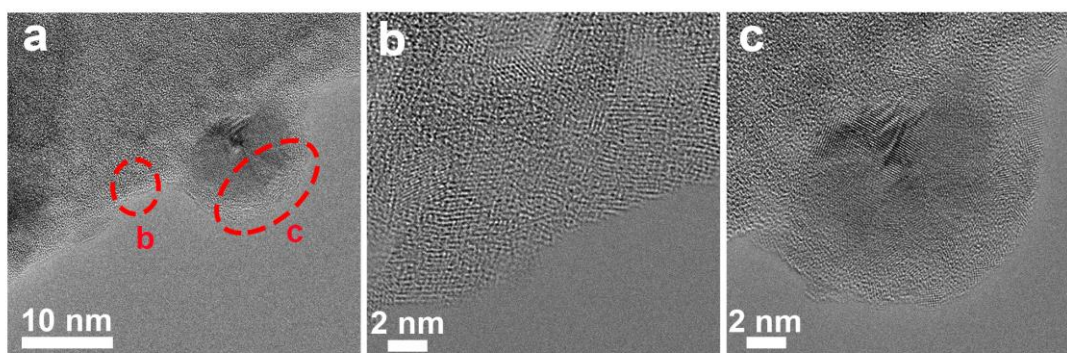

**Figure S11.** (a-c) TEM images of (Ni-MoO<sub>2</sub>)@C/NF after hydrogen evolution stability test.

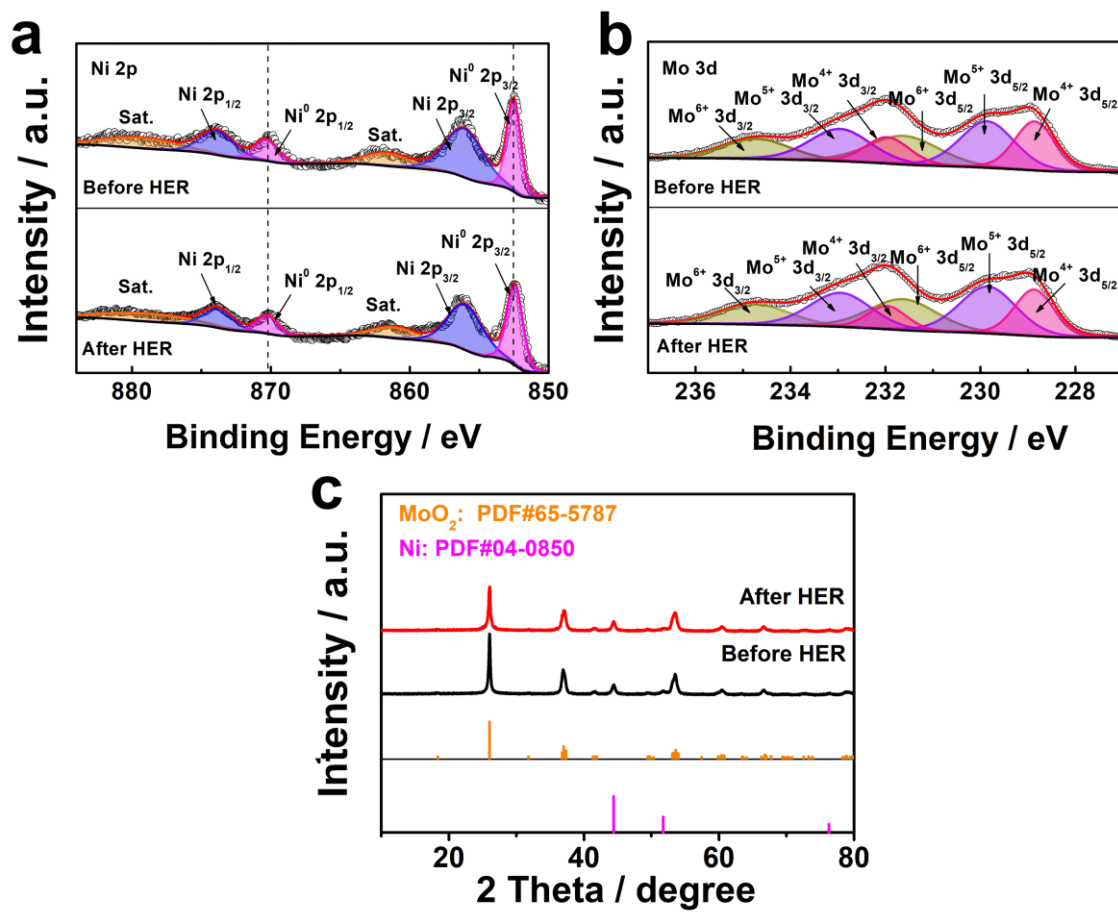

**Figure S12.** (a, b) XPS and (c) XRD images of (Ni-MoO<sub>2</sub>)@C/NF after hydrogen evolution stability test.



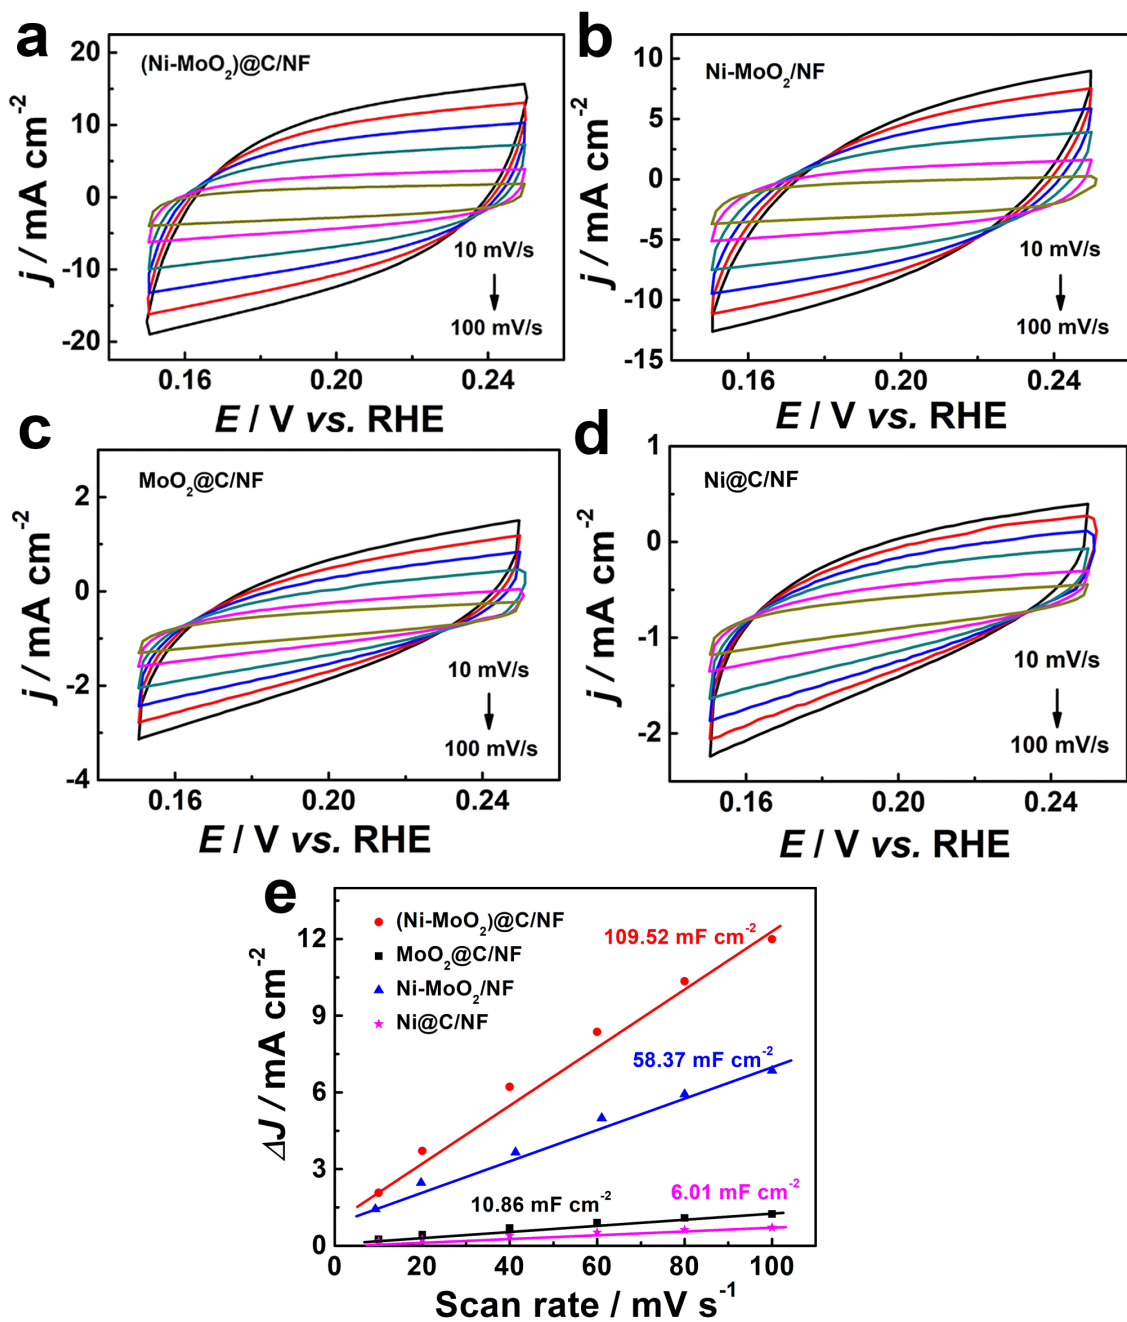

**Figure S13.** (a-d) Typical cyclic voltammograms of (Ni-MoO<sub>2</sub>)@C/NF, Ni-MoO<sub>2</sub>/NF, MoO<sub>2</sub>@C/NF, and Ni@C/NF at scan rates ranging from 10 to 100 mV s<sup>-1</sup>, the scanning potential range is from 0.15 V to 0.25 V; (e) estimation of  $C_{dl}$  by plotting the capacitive current density against the scan rate to fit a linear regression of the as-prepared samples.

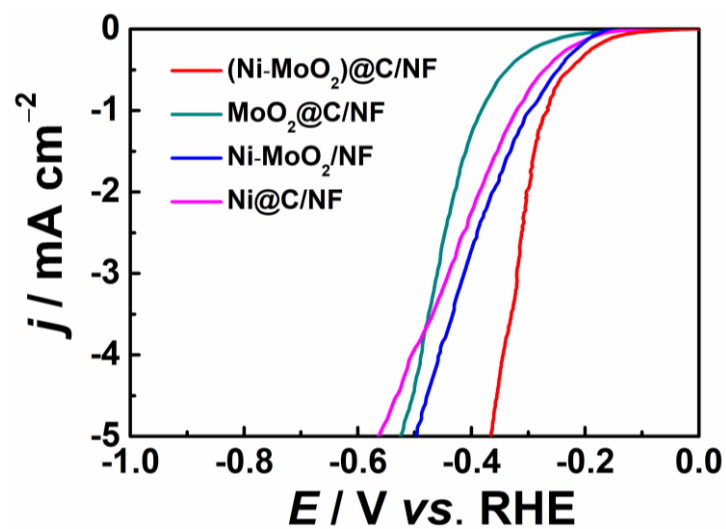

**Fig. S14.** HER activity (current density) of the samples normalized by their EASAs.

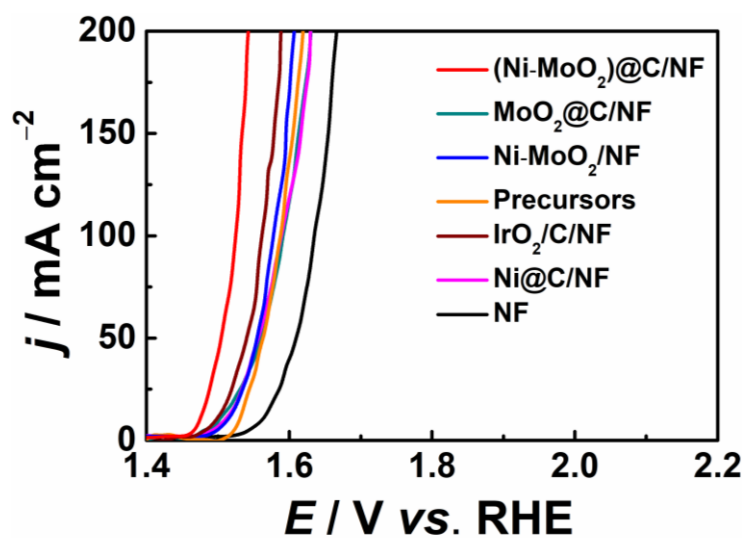

**Figure S15.** LSV curves of OER for the investigated catalysts in 1.0 M KOH.

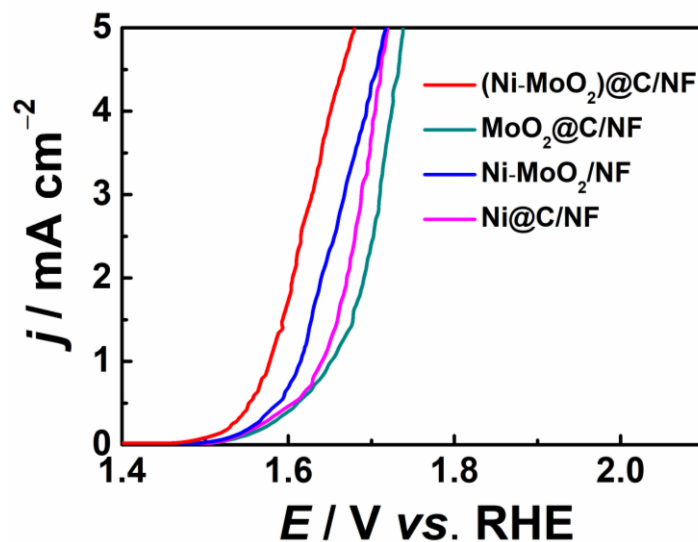

Fig. S16. OER activity (current density) of the samples normalized by their EASAs.

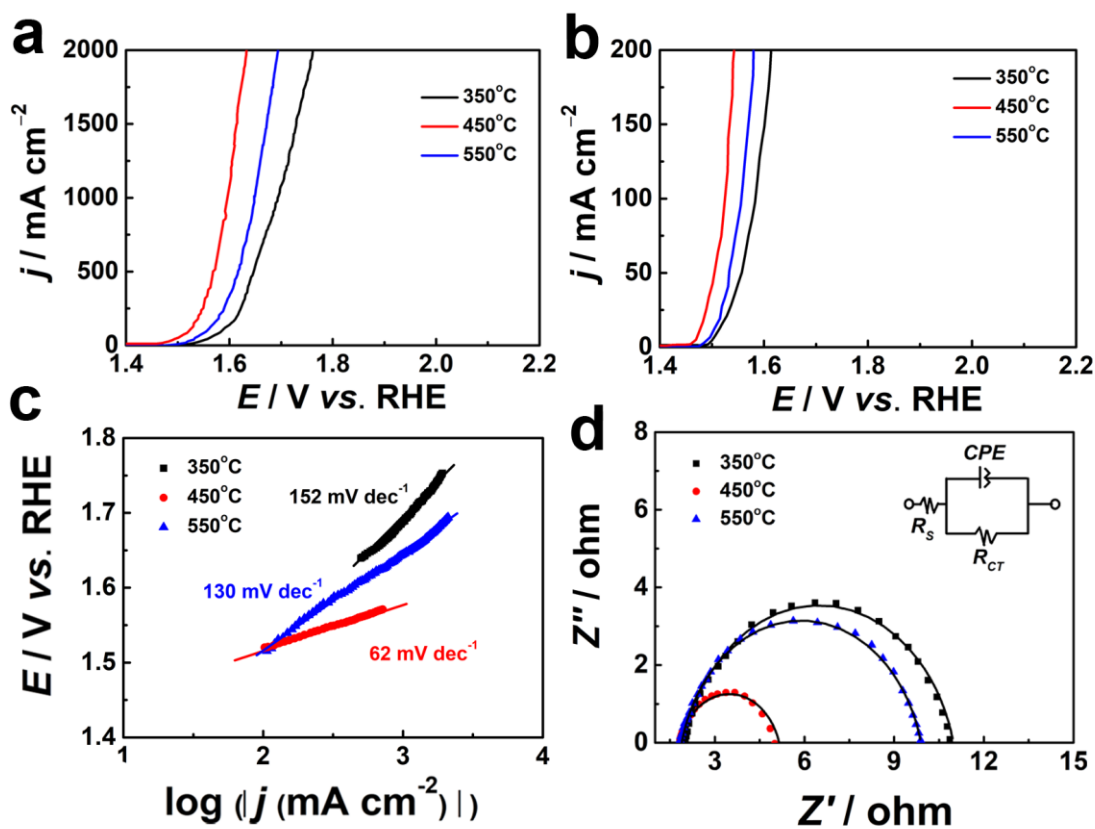

Figure S17. (a, b) LSV curves for OER of (Ni-MoO<sub>2</sub>)@C/NF at different temperatures. (c) corresponding Tafel slopes; (d) corresponding Nyquist plots tested at 1.50 V for OER with a frequency from 100 kHz to 100 mHz in 1.0 M KOH; inset is the equivalent circuit model.

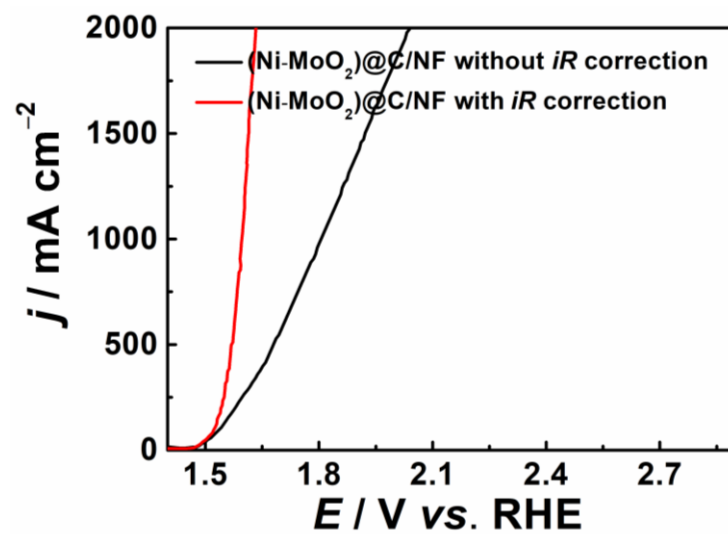

**Figure S18.** LSV curves of (Ni-MoO<sub>2</sub>)@C/NF with/without *iR* correction for OER.

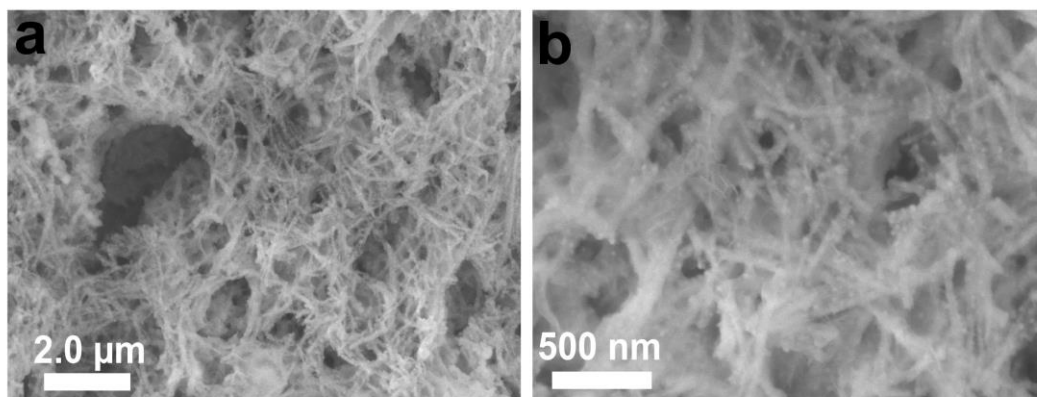

**Figure S19.** (a, b) SEM images of (Ni-MoO<sub>2</sub>)@C/NF after oxygen evolution stability test.

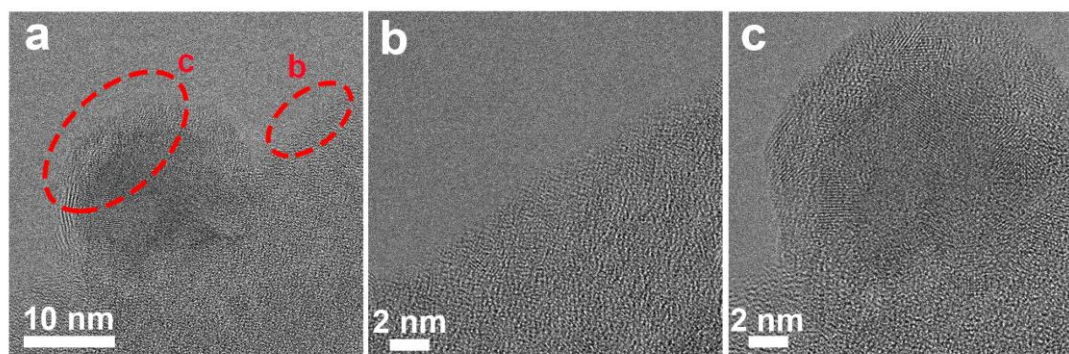

**Figure S20.** (a-c) TEM images of (Ni-MoO<sub>2</sub>)@C/NF after oxygen evolution stability test.

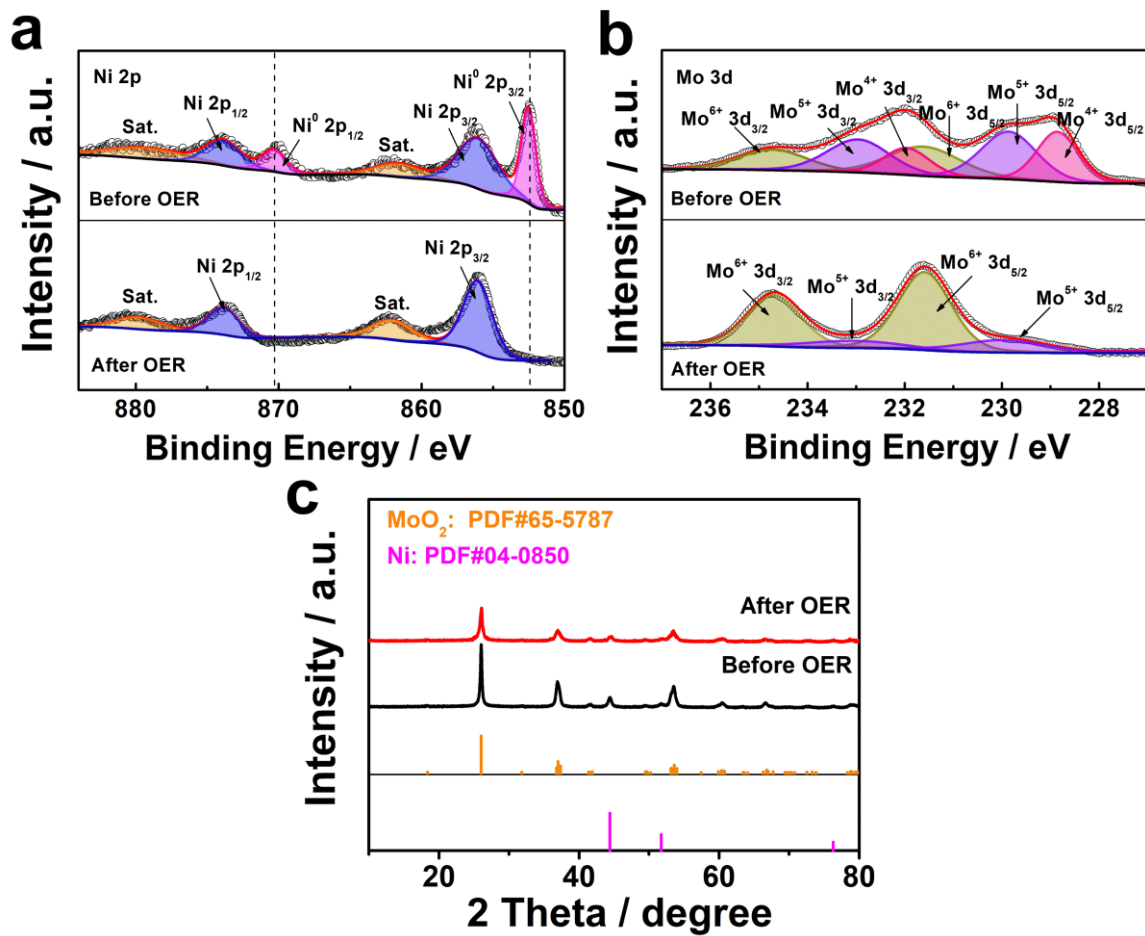

**Figure S21.** (a, b) XPS and (c) XRD images of (Ni-MoO<sub>2</sub>)@C/NF after oxygen evolution stability test.

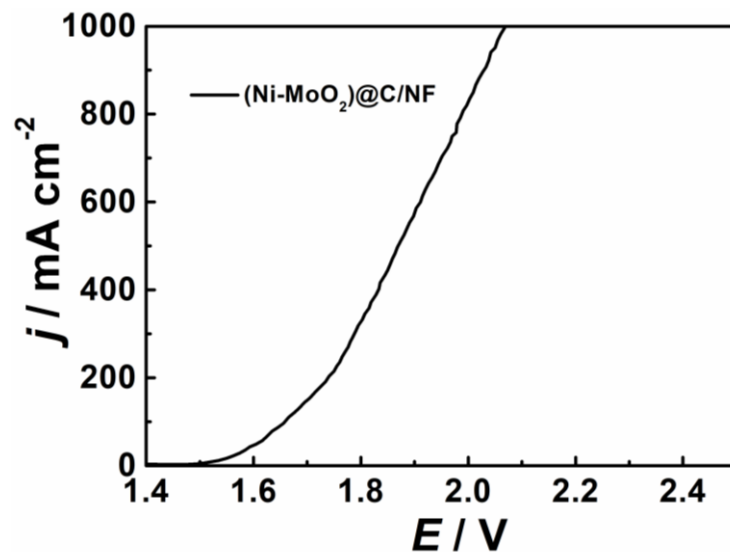

**Figure S22.** The LSV curves of (Ni-MoO<sub>2</sub>)@C/NF || (Ni-MoO<sub>2</sub>)@C/NF for overall water splitting.

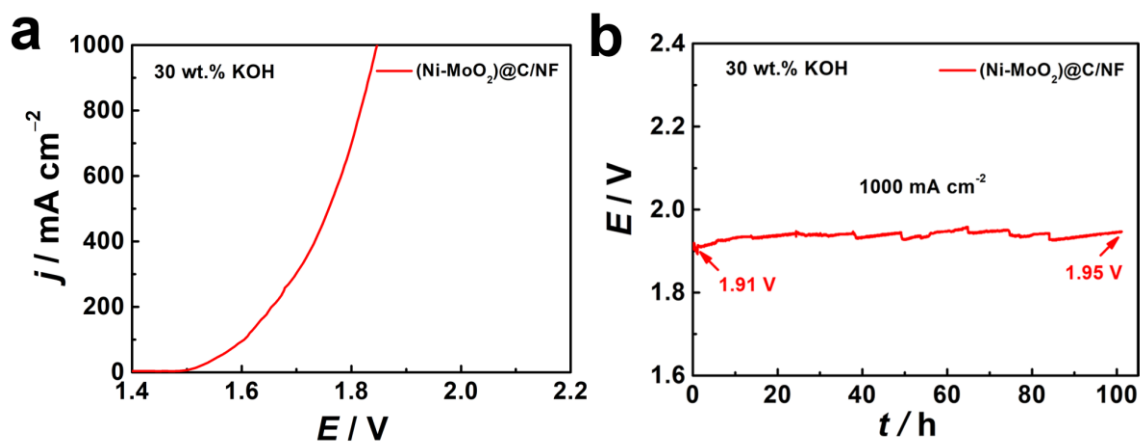

**Figure S23.** (a) The LSV and (b) stability curves of (Ni-MoO<sub>2</sub>)@C/NF || (Ni-MoO<sub>2</sub>)@C/NF in 30 wt.% KOH solution for overall water splitting.
